# Supplementary material
Source: Springer Nature journal article supplement (https://www.springermedizin.de/resource/supplementary/13256_2009_1472_MOESM5_ESM.pdf/9647750)

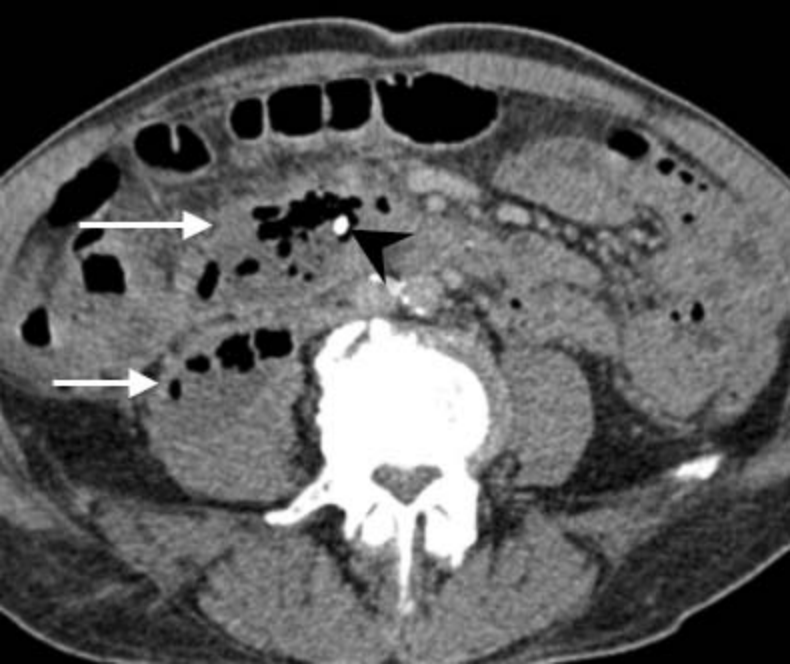

Supplement: MOESM5 [file 9647750]
